# Supplementary material
Source: PubMed Central journal article supplement (PMC6750804)
Supplement: NIHMS1048289-supplement-Supplementary_Material.pdf [file NIHMS1048289-supplement-Supplementary_Material.pdf]

**Table A1.** Coding of Educational Attainment in the HRS and Add Health

| Label                                                            | Code | <i>N</i> | %    |
|------------------------------------------------------------------|------|----------|------|
| <b>HRS</b>                                                       |      |          |      |
| 8 years or fewer, w/o HS diploma, GED, or college experience     | 8    | 306      | 3.7  |
| 9+ years, w/o HS diploma, GED, or college experience             | 10   | 717      | 8.8  |
| HS diploma or GED, w/o college experience                        | 12   | 3,142    | 38.4 |
| 13 years (with a HS diploma/GED and college experience)          | 13   | 660      | 8.1  |
| 14 years (with a HS diploma/GED and college experience)          | 14   | 886      | 10.8 |
| 15+ years, w/o BA (with a HS diploma/GED and college experience) | 15   | 433      | 5.3  |
| BA (<=16 years)                                                  | 16   | 938      | 11.5 |
| BA (17+ years)                                                   | 17   | 276      | 3.4  |
| MA/MBA                                                           | 19   | 632      | 7.7  |
| PhD/Law/MD                                                       | 20   | 190      | 2.3  |
| Total                                                            |      | 8,180    | 100  |
| <b>Add Health</b>                                                |      |          |      |
| 8th grade or less                                                | 8    | 19       | .4   |
| Some high school                                                 | 10   | 329      | 6.9  |
| High school graduate                                             | 12   | 747      | 15.7 |
| Some vocational/technical training (post-HS)                     | 13   | 168      | 3.5  |
| Completed vocational/technical school (post-HS)                  | 14   | 304      | 6.4  |
| Some college                                                     | 15   | 1,627    | 34.2 |
| BA                                                               | 16   | 980      | 20.6 |
| Some graduate or professional school                             | 17   | 209      | 4.4  |
| MA                                                               | 19   | 282      | 5.9  |
| PhD or professional school                                       | 20   | 90       | 1.9  |
| Total                                                            |      | 4,775    | 100  |

*Note:* HS = high school; GED = General Education Diploma; BA = bachelor's degree; MA = master's degree; MBA = master of business administration; PhD = doctoral degree; MD = medical degree. HRS = Health and Retirement Study (RAND 2014). Add Health = National Longitudinal Study of Adolescent to Adult Health (Harris 2013).

Table A1. Coding of Educational Attainment in the HRS and Add Health
